# Supplementary material
Source: PubMed Central journal article supplement (PMC1255806)
Supplement: bmj_331_7521_897__1.pdf [file bmj_331_7521_897__1.pdf]

**Posted as supplied by the authors**

**Table A** Thrombolytic and angioplasty treatment data (35 day mortality/ patients). Fourteen randomised controlled trials on thrombolytic treatments (Boland *et al*, 2003), and 22 RCTs comparing angioplasty to thrombolytic(Keeley *et al*, 2004): 35 day mortality / patient totals.

|                 | SK         | t-PA       | at-PA     | SK+t-PA   | r-PA      | TNK      | PCTA   |
|-----------------|------------|------------|-----------|-----------|-----------|----------|--------|
| CI, 1993        | 9/130      | 6/123      |           |           |           |          |        |
| Cherng, 1992    | 5/63       | 2/59       |           |           |           |          |        |
| ECSG, 1985      | 3/65       | 3/64       |           |           |           |          |        |
| GISSI-2, 1990   | 887/10396  | 929/10372  |           |           |           |          |        |
| ISIS-3, 1992    | 1455/13780 | 1418/13746 |           |           |           |          |        |
| PAIMS, 1989     | 7/85       | 4/86       |           |           |           |          |        |
| TIMI-1, 1987    | 12/159     | 7/157      |           |           |           |          |        |
| White, 1989     | 10/135     | 5/135      |           |           |           |          |        |
| GUSTO-1, 1993   | 1472/20251 |            | 652/10396 | 723/10374 |           |          |        |
| KAMIT, 1991     | 4/107      |            |           | 6/109     |           |          |        |
| INJECT, 1995    | 285/3004   |            |           |           | 270/3006  |          |        |
| Zijlstra, 1993  | 11/149     |            |           |           |           |          | 2/152  |
| Riberio, 1993   | 1/50       |            |           |           |           |          | 3/50   |
| Grinfeld, 1996  | 8/58       |            |           |           |           |          | 5/54   |
| Zijlstra, 1997  | 1/53       |            |           |           |           |          | 1/47   |
| Akhras, 1997    | 4/45       |            |           |           |           |          | 0/42   |
| Widimsky, 2000  | 14/99      |            |           |           |           |          | 7/101  |
| De Boer, 2002   | 9/41       |            |           |           |           |          | 3/46   |
| Widimsky, 2002  | 42/421     |            |           |           |           |          | 29/429 |
| DeWood, 1990    |            | 2/44       |           |           |           |          | 3/46   |
| Grines, 1993    |            | 13/200     |           |           |           |          | 5/195  |
| Gibbons, 1993   |            | 2/56       |           |           |           |          | 2/47   |
| GUSTO-3, 1997   |            |            | 356/4921  |           | 757/10138 |          |        |
| RAPID-2, 1996   |            |            | 13/155    |           | 7/169     |          |        |
| ASSENT-2, 1999  |            |            | 522/8488  |           |           | 523/8461 |        |
| Ribichini, 1996 |            |            | 3/55      |           |           |          | 1/55   |
| Garcia, 1997    |            |            | 10/94     |           |           |          | 3/95   |
| GUSTO-2, 1997   |            |            | 40/573    |           |           |          | 32/565 |
| Le May, 2001    |            |            | 2/61      |           |           |          | 3/62   |
| Bonnefoy, 2002  |            |            | 19/419    |           |           |          | 20/421 |
| Schomig, 2000   |            |            | 5/69      |           |           |          | 3/71   |
| Vermeer, 1999   |            |            | 5/75      |           |           |          | 5/75   |
| Andersen, 2002  |            |            | 59/782    |           |           |          | 52/790 |
| Kastrati, 2002  |            |            | 5/81      |           |           |          | 2/81   |
| Aversano, 2002  |            |            | 16/226    |           |           |          | 12/225 |
| Grines, 2002    |            |            | 8/66      |           |           |          | 6/71   |

SK- streptokinase; t-PA - tissue-plasminogen activator; at-PA – accelerated tissue-plasminogen activator; r-PA – reteplase; TNK – tenecteplase; PCTA - primary percutaneous transluminal coronary angioplasty.

Boland A., Dundar Y., Bagust A., Haycox A., Hill R., Mujica Mota R., Walley T., and Dickson R. Early thrombolysis for the treatment of acute myocardial infarction: a systematic review and economic evaluation. *Health Technology Assessment* 2003;7:1-136.

Keeley EC, Boura JA, Grines CL. Primary angioplasty versus intravenous thrombolytic therapy for acute myocardial infarction: a quantitative review of 23 randomised trials. *Lancet* 2003;**361**:13-20.

**Posted as supplied by the author**

**Mixed treatment comparisons: should they be more routine?**

**Web Extra Supplement**

### Statistical model

A previously published model<sup>1,2</sup> is presented in a more general form, to assist application to any mixed comparison evidence structure.

Assume that the seven treatments are labelled A,B,C,D,E,F,G, and that treatment A is the reference treatment for the meta-analysis - in this example Streptokinase. In each trial  $j$  we observe  $r_{jk}$  deaths on treatment  $k$ , in a sample of  $n_{jk}$ . We assume a binomial likelihood:  $r_{jk} \sim \text{Bin}(p_{jk}, n_{jk})$ , where  $p_{jk}$  is mortality in trial  $j$  under treatment  $k$ . Our underlying model is:

$$\text{logit}(p_{jk}) = \begin{matrix} \mu_{jb} & b=A,B,C\dots \text{ if } k = b \\ \mu_{jb} + \delta_{jbk} & \text{if } k \text{ alphabetically after } b \end{matrix}$$

$\mu_{jb}$  is the log odds of mortality on treatment  $b$  in trial  $j$  - a study-specific 'baseline' parameter, and  $\delta_{jbk}$  is the trial-specific Log Odds Ratio of treatment  $k$  relative to treatment  $b$ . For example, if trial  $j$  compares treatments B and C, the B arm provides an estimate of  $\text{logit}(p_{jB}) = \mu_{jB}$ , while the C arm estimates  $\text{logit}(p_{jC}) = \mu_{jB} + \delta_{jBC}$ .

The trial-specific LORs are now drawn from a random-effects distribution:  $\delta_{jbk} \sim N(d_{bk}, \sigma_{bk}^2)$ . To identify the means  $d_{bk}$  of these distributions, we take the six treatment effects of B, C, D, E, F, G relative to reference treatment A as our *basic* parameters.<sup>3</sup> These are given vague priors:  $d_{AB}, d_{AC}, d_{AD}, d_{AE}, d_{AF}, d_{AG} \sim N(0, 10000)$ . The remaining 9 contrasts, *functional* parameters, can be expressed in terms of these basic parameters:  $d_{BC} = d_{AC} - d_{AB}$ ;  $d_{BD} = d_{AD} - d_{AB}$ ;  $d_{CD} = d_{AD} - d_{AC}$ ; .... etc ....

The study effects are treated as unrelated nuisance parameters with vague priors:  $\mu_{jb} \sim N(0, 10000)$ . Note that, with just two treatments A and B, the model is that typically proposed for Bayesian pair-wise meta-analysis.<sup>4,5,6</sup>

If  $\sigma^2 = 0$  we obtain a fixed effects model. For random-effects, we make the assumption of *homogeneous variance*:  $\sigma_{bk}^2 = \sigma^2$ . A vague prior is provided for the common variance term, for example  $\sigma \sim \text{Uniform}(0, 2)$ . Multi-arm trials on treatments A,B,C, for example, induce a covariance between  $\delta_{jAB}$  and  $\delta_{jAC}$ . Under homogeneous variance the covariance is  $\sigma^2/2$ <sup>1,2,7</sup>.

### WinBUGS 1.4 Programmes for MTC analysis.

The fixed and random effects programmes on which this analysis was based can be downloaded from [http://www.hsrc.ac.uk/Current\\_research/research\\_programmes/mpes.htm](http://www.hsrc.ac.uk/Current_research/research_programmes/mpes.htm), where they appear as FE.odc and RE-3arm.odc respectively. Software to handle trials with more than 3 arms can also be found on this site. These programmes can be applied to any mixed treatment structure and only require the user to state the number of observations, studies and treatments in the data list. The programmes should only be used by those familiar with Bayesian methods and with WinBUGS 1.4 software<sup>8</sup>. The latter can be downloaded free of charge from <http://www.mrc-bsu.cam.ac.uk/bugs/welcome.shtml>.

## Data Structure

A declaration is required for the number of observations, N, number of studies, NS, and number of treatments, NT. For this dataset, there are 35 trials making pair-wise comparisons and one 3-arm trial:

```
list(N=73, NS=36, NT=7)
```

The data proper appear as vectors of length 73, set out in columns. Each row represents a single trial arm.

s[] indicates the study

t[] the treatment

r[] the numerator

n[] the denominator

b[] the comparator treatment (baseline) for that trial, such that  $b[i] \leq t[i]$

m[] takes the values 1,2 for 2-arm trials, 1,2,3 for 3-arm. This vector is only needed for random-effects models

The treatments are coded as follows:

1 = streptokinase

2 = tissue type plasminogen activator

3 = accelerated tissue type plasminogen activator

4 = streptokinase plus tissue type plasminogen activator

5 = reteplase

6 = tenecteplase

7 = percutaneous transluminal coronary angioplasty

| s[] | t[] | r[]  | n[]   | b[] | m[] |
|-----|-----|------|-------|-----|-----|
| 1   | 1   | 1472 | 20251 | 1   | 1   |
| 1   | 3   | 652  | 10396 | 1   | 2   |
| 1   | 4   | 723  | 10374 | 1   | 3   |
| 2   | 1   | 9    | 130   | 1   | 1   |
| 2   | 2   | 6    | 123   | 1   | 2   |
| 3   | 1   | 5    | 63    | 1   | 1   |
| 3   | 2   | 2    | 59    | 1   | 2   |
| 4   | 1   | 3    | 65    | 1   | 1   |
| 4   | 2   | 3    | 64    | 1   | 2   |
| 5   | 1   | 887  | 10396 | 1   | 1   |
| 5   | 2   | 929  | 10372 | 1   | 2   |
| 6   | 1   | 1455 | 13780 | 1   | 1   |
| 6   | 2   | 1418 | 13746 | 1   | 2   |
| 7   | 1   | 7    | 85    | 1   | 1   |
| 7   | 2   | 4    | 86    | 1   | 2   |
| 8   | 1   | 12   | 159   | 1   | 1   |
| 8   | 2   | 7    | 157   | 1   | 2   |
| 9   | 1   | 10   | 135   | 1   | 1   |
| 9   | 2   | 5    | 135   | 1   | 2   |
| 10  | 1   | 4    | 107   | 1   | 1   |
| 10  | 4   | 6    | 109   | 1   | 2   |
| 11  | 1   | 285  | 3004  | 1   | 1   |
| 11  | 5   | 270  | 3006  | 1   | 2   |
| 12  | 1   | 11   | 149   | 1   | 1   |
| 12  | 7   | 2    | 152   | 1   | 2   |
| 13  | 1   | 1    | 50    | 1   | 1   |
| 13  | 7   | 3    | 50    | 1   | 2   |
| 14  | 1   | 8    | 58    | 1   | 1   |
| 14  | 7   | 5    | 54    | 1   | 2   |
| 15  | 1   | 1    | 53    | 1   | 1   |
| 15  | 7   | 1    | 47    | 1   | 2   |
| 16  | 1   | 4    | 45    | 1   | 1   |
| 16  | 7   | 0    | 42    | 1   | 2   |
| 17  | 1   | 14   | 99    | 1   | 1   |
| 17  | 7   | 7    | 101   | 1   | 2   |
| 18  | 1   | 9    | 41    | 1   | 1   |
| 18  | 7   | 3    | 46    | 1   | 2   |
| 19  | 1   | 42   | 421   | 1   | 1   |
| 19  | 7   | 29   | 429   | 1   | 2   |
| 20  | 2   | 2    | 44    | 2   | 1   |
| 20  | 7   | 3    | 46    | 2   | 2   |
| 21  | 2   | 13   | 200   | 2   | 1   |
| 21  | 7   | 5    | 195   | 2   | 2   |
| 22  | 2   | 2    | 56    | 2   | 1   |
| 22  | 7   | 2    | 47    | 2   | 2   |
| 23  | 3   | 3    | 55    | 3   | 1   |
| 23  | 7   | 1    | 55    | 3   | 2   |
| 24  | 3   | 10   | 94    | 3   | 1   |
| 24  | 7   | 3    | 95    | 3   | 2   |
| 25  | 3   | 40   | 573   | 3   | 1   |
| 25  | 7   | 32   | 565   | 3   | 2   |
| 26  | 3   | 2    | 61    | 3   | 1   |
| 26  | 7   | 3    | 62    | 3   | 2   |
| 27  | 3   | 16   | 419   | 3   | 1   |
| 27  | 7   | 20   | 421   | 3   | 2   |

```

28 3 5 69 3 1
28 7 3 71 3 2
29 3 5 75 3 1
29 7 5 75 3 2
30 3 59 782 3 1
30 7 52 790 3 2
31 3 5 81 3 1
31 7 2 81 3 2
32 3 16 226 3 1
32 7 12 225 3 2
33 3 8 66 3 1
33 7 6 71 3 2
34 3 522 8488 3 1
34 6 523 8461 3 2
35 3 356 4921 3 1
35 5 757 10138 3 2
36 3 13 155 3 1
36 5 7 169 3 2
END

```

### Fixed effect model

```

model{
for(i in 1:N) { logit(p[s[i],t[i]])<-mu[s[i]]+ d[t[i]] - d[b[i]] # model
                r[i]~dbin(p[s[i],t[i]],n[i]) } # binomial likelihood

for(j in 1:NS) { mu[j]~dnorm(0,.0001)} # vague priors for 36 trial baselines

d[1]<-0
for (k in 2:NT) {d[k] ~ dnorm(0,.001) } # vague priors for 6 basic LOR parameters

```

### Random-effects model including 3-arm trials

```

model{
sw[1] <- 0
for(i in 1:N) {
logit(p[i])<-mu[s[i]]+ delta[i] * (1-equals(t[i],b[i])) # model
r[i]~dbin(p[i],n[i]) # binomial likelihood
delta[i] ~ dnorm(md[i],taud[i]) # trial-specific LOR distributions
taud[i] <- tau * (1 + equals(m[i],3) /3) # precisions of LOR distributions
md[i] <- d[t[i]] - d[b[i]] + equals(m[i],3) * sw[i] # means of LOR distributions
}
for (i in 2:N) { sw[i] <- (delta[i-1] - d[t[i-1]] + d[b[i-1]])/2} # adjustment for 3-arm trials

for(j in 1:NS){ mu[j]~dnorm(0,.0001) } # vague priors for 36 trial baselines

d[1]<-0
for (k in 2:NT) {d[k] ~ dnorm(0,.0001) } # vague priors for 6 basic LOR parameters

sd~dunif(0,2) # vague prior for random-effects standard deviation
tau<-1/pow(sd,2)
}

```

## 1. Additional code used in the analysis

Some additional code has been added to each program to :

1. Form a distribution for the log odds of mortality in the reference treatment, streptokinase, and add the LORs relative to streptokinase to this baseline to find the absolute efficacy  $T[k]$  of each treatment  $k$ , given that assumed baseline (Table 3). We have used the mean log odds of the mortality under streptokinase, averaged over the 19 trials in which it was used. Specific trials or cohort studies could equally well be used to define efficacy of the reference treatment.
2. Rank treatments in efficacy, and calculate the probability that each is best: `best[]` (Table 3).
3. Calculate all the pairwise odds ratios between the treatments in the MTC analysis: `or[,]` (Table 2),

### # Absolute treatment effects based on the mean response to Treatment A over 19 trials

```
for (i in 1:N) {mu1[i] <- mu[s[i]] * equals(t[i],1) }  
for (k in 1:NT) { logit(T[k])<- sum(mu1[])/19 +d[k] }
```

### # Ranking and probability {treatment k is best}

```
for (k in 1:NT) { rk[k]<- rank(T[],k)  
                best[k]<-equals(rk[k],1)}
```

### # All pairwise odds ratios

```
for (c in 1:(NT-1)) { for (k in (c+1):NT) { or[c,k] <- exp(d[k] - d[c] ) }}
```

Similar models for Mixed Treatment Comparisons can be programmed using non-Bayesian methods, for example in SAS, STATA, or S-PLUS software. Calculation of the probability that each treatment is best could then be achieved through bootstrap methods.<sup>9</sup>

## Reference List

1. Higgins JPT, Whitehead J. Borrowing strength from external trials in a meta-analysis. *Statistics in Medicine* 1996;**15**:2733-2749.
2. Whitehead A. *Meta-analysis of controlled clinical trials*. Chichester, UK: 2002.
3. Eddy DM, Hasselblad V, Shachter R. *Meta-analysis by the Confidence Profile Method*. London: Academic Press, 1992.
4. Smith TC, Spiegelhalter DJ, Thomas SL. Bayesian approaches to random-effects meta-analysis: a comparative study. *Statistics in Medicine* 1995;**14**:2685-2699.

5. Thompson SG, Smith TC, Sharp SJ. Investigating underlying risk as a source of heterogeneity in meta-analysis. *Statistics in Medicine* 1997;**16**:2741-2758.
6. Sutton AJ, Abrams EJ. Bayesian methods in meta-analysis and evidence synthesis. *Statistical Methods in Medical Research* 2001;**10**:277-303.
7. Lu G, Ades AE. Combination of direct and indirect evidence in mixed treatment comparisons. *Statistics in Medicine* 2004;**23**:3105-3124.
8. Spiegelhalter DJ, Thomas A, Best N, Lunn D. *WinBUGS User Manual: Version 1.4*. Cambridge, UK: MRC Biostatistics Unit, 2001.
9. Efron B, Tibshiranie RJ. *An introduction to the bootstrap*. New York: Chapman & Hall, 1993.
